# Supplementary material for: Global analysis of alternative splicing regulation by insulin and wingless signaling in Drosophila cells
Source: PubMed Central journal article supplement (PMC2687788; doi:10.1186/gb-2009-10-1-r11), 2009-01-29
Supplement: gb-2009-10-1-r11-S1.pdf [file gb-2009-10-1-r11-S1.pdf]

| cg_list | Insulin_Zscore_ave | Insulin_1_Zscore | Insulin_2_Zscore | Insulin_3_Zscore |
|---------|--------------------|------------------|------------------|------------------|
| CG16833 | 3,2                | 3,105451171      | 3,366304823      | 3,23091471       |
| CG18076 | -2,0               | -1,735312649     | -2,231090798     | -2,169268468     |
| CG4551  | -2,3               | -2,296373281     | -2,408859141     | -2,296390729     |
| CG10576 | 3,0                | 2,961970565      | 3,068809719      | 2,96397203       |
| CG7958  | -2,1               | -2,145340194     | -2,026924185     | -2,063913327     |
| CG9281  | 3,2                | 3,437529043      | 3,161275571      | 2,917890103      |
| CG3978  | -2,6               | -2,261259772     | -2,778362858     | -2,643706836     |
| CG1516  | 2,4                | 2,693792306      | 2,104340979      | 2,264778296      |
| CG5059  | -5,8               | -6,011860495     | -5,788981532     | -5,594158921     |
| CG32195 | -3,1               | -4,436600432     | -3,052994249     | -1,863727034     |
| CG9520  | -3,4               | -3,444706082     | -3,492509438     | -3,132177999     |
| CG18466 | 7,2                | 6,73524119       | 7,505792623      | 7,234970254      |
| CG4280  | -2,4               | -2,521584096     | -2,306890275     | -2,489406187     |
| CG6058  | 3,4                | 3,557761977      | 3,508615586      | 3,183162707      |
| CG1817  | -2,2               | -2,06103971      | -2,306892441     | -2,33002985      |
| CG12919 | -2,8               | -2,937255358     | -2,384754595     | -2,979698417     |
| CG31299 | 2,1                | 1,941417767      | 2,192690859      | 2,052962559      |
| CG30011 | -2,1               | -2,064833443     | -2,242935373     | -1,845887103     |
| CG2194  | 2,1                | 1,858668492      | 1,89341224       | 2,50124459       |
| CG6643  | -2,7               | -2,755696616     | -2,733045064     | -2,57587592      |
| CG31543 | 3,7                | 3,800052318      | 3,931523595      | 3,229280517      |
| CG10971 | -2,5               | -2,64070539      | -2,341492062     | -2,58351435      |
| CG6134  | -3,4               | -3,352297017     | -3,531744727     | -3,30962027      |
| CG8026  | 3,1                | 2,764095785      | 3,377963535      | 3,22462488       |
| CG11120 | -2,4               | -2,663051768     | -2,332112722     | -2,100633367     |
| CG2086  | -2,9               | -2,845118587     | -3,009472316     | -2,879536892     |
| CG9696  | 2,1                | 2,337113397      | 2,120648181      | 1,88861293       |
| CG10433 | -2,8               | -2,574398343     | -2,884775421     | -2,968826928     |
| CG6084  | -2,0               | -2,194368134     | -2,197099781     | -1,696485629     |
| CG3647  | 2,0                | 2,22223674       | 1,897124274      | 1,933730383      |
| CG3168  | 2,6                | 2,898122974      | 2,794102603      | 2,120958899      |
| CG13213 | -2,7               | -2,625896644     | -2,841569954     | -2,666936449     |
| CG31666 | -2,4               | -2,186044046     | -2,444055526     | -2,619769923     |
| CG33188 | -2,1               | -2,058725076     | -1,802666153     | -2,397431687     |
| CG10021 | 2,4                | 2,562000431      | 2,336826086      | 2,167013236      |
| CG14080 | -2,6               | -2,273245349     | -2,491931889     | -2,898073606     |
| CG1600  | -3,2               | -3,27832849      | -3,190575016     | -3,277791586     |
| CG15081 | 2,1                | 1,876805301      | 2,236284506      | 2,095577919      |
| CG10691 | 2,2                | 1,926841258      | 2,172624209      | 2,457843433      |
| CG11486 | -2,3               | -2,233708481     | -2,438309561     | -2,354589742     |
| CG8118  | -2,4               | -2,367533467     | -2,367424618     | -2,326950054     |
| CG32369 | 3,5                | 3,97301985       | 3,630564128      | 2,968031777      |
| CG4608  | 5,9                | 5,804696013      | 6,216216765      | 5,598631313      |
| CG18808 | -2,0               | -1,85058462      | -2,128853646     | -2,052735111     |
| CG2257  | -2,3               | -2,201300623     | -2,484750509     | -2,328894834     |
| CG11661 | 2,3                | 2,398129204      | 2,318590706      | 2,060239732      |
| CG11652 | 3,7                | 3,645365504      | 3,972374902      | 3,49945389       |
| CG15154 | 3,2                | 3,558645582      | 3,415108307      | 2,69637405       |
| CG3992  | -3,1               | -2,874519551     | -3,07871077      | -3,456487279     |
| CG32103 | 2,8                | 3,035957872      | 2,797553688      | 2,617709942      |
| CG3979  | 3,3                | 3,479899083      | 3,227569683      | 3,200766369      |
| CG4429  | 2,3                | 2,486516667      | 2,605323458      | 1,936118792      |

|         |      |              |              |              |
|---------|------|--------------|--------------|--------------|
| CG3606  | 2,4  | 2,025453994  | 2,781930518  | 2,252279295  |
| CG9878  | 2,8  | 2,810707517  | 2,95916334   | 2,682232217  |
| CG15112 | -2,7 | -2,48876564  | -2,492635714 | -2,972112231 |
| CG6767  | 2,8  | 3,116176436  | 2,875257645  | 2,497873716  |
| CG11844 | 2,8  | 2,483334876  | 3,116718792  | 2,714556532  |
| CG2674  | 2,1  | 2,014449374  | 2,306488257  | 1,925330724  |
| CG1572  | -2,2 | -2,070108015 | -1,588858865 | -2,850132191 |
| CG33199 | 2,1  | 2,523679305  | 1,72209512   | 2,18441355   |
| CG7421  | 3,8  | 3,975127681  | 3,885875653  | 3,68693109   |
| CG1743  | -3,9 | -3,75724377  | -3,704088713 | -4,308940453 |
| CG9809  | 3,8  | 3,968339203  | 3,865407524  | 3,570191269  |
| CG5854  | 3,6  | 3,252928663  | 3,716956751  | 3,714749613  |
| CG14253 | -2,5 | -2,817351518 | -2,615644027 | -1,930183293 |
| CG18335 | -4,6 | -4,324740366 | -4,869360706 | -4,579185064 |
| CG8095  | -2,5 | -2,459476471 | -2,531504455 | -2,613430511 |
| CG3937  | -2,8 | -2,697737679 | -2,740600441 | -3,03502957  |
| CG5033  | 2,9  | 2,932714201  | 2,831383331  | 2,930158846  |
| CG7334  | 2,0  | 2,387594905  | 2,021080518  | 1,718606219  |
| CG8222  | -4,1 | -4,183452607 | -3,880231824 | -4,108686292 |
| CG8355  | -2,0 | -1,501001324 | -2,550349908 | -2,024932773 |
| CG1544  | 2,5  | 2,487183868  | 2,362767309  | 2,737966181  |
| CG3983  | 2,8  | 2,698654207  | 2,611299232  | 3,094934727  |
| CG6231  | 3,8  | 4,006938567  | 3,489216108  | 3,806889921  |
| CG4257  | -2,0 | -1,769418548 | -2,230390549 | -2,063138863 |
| CG5973  | -4,2 | -4,160892869 | -4,560722576 | -3,833512178 |
| CG12128 | 2,2  | 2,094485899  | 2,344570091  | 2,236902043  |
| CG14792 | 2,4  | 1,861130317  | 2,620110718  | 2,70508564   |
| CG2092  | -2,1 | -2,137329195 | -2,3612487   | -1,904429502 |
| CG2671  | -2,4 | -2,435886124 | -2,246163832 | -2,564514385 |
| CG4675  | -2,3 | -1,923053138 | -2,50814961  | -2,576238905 |
| CG8327  | 2,0  | 1,584921188  | 2,228756587  | 2,194616918  |
| CG1799  | 2,6  | 2,466344236  | 2,639665054  | 2,690573281  |
| CG3001  | 4,2  | 4,589941071  | 4,529634349  | 3,49832087   |
| CG8098  | 2,6  | 2,939772849  | 2,621550147  | 2,3582621    |
| CG30035 | 4,9  | 5,007274489  | 4,646242776  | 4,978034415  |
| CG1106  | -2,1 | -2,337699877 | -2,069648932 | -1,882300835 |
| CG33066 | 2,8  | 2,845047709  | 2,668539609  | 2,914472602  |
| CG11804 | -3,7 | -3,779516826 | -3,778405644 | -3,540843167 |
| CG6692  | -4,3 | -4,649121476 | -4,464182954 | -3,821820999 |
| CG16944 | 3,4  | 3,590118804  | 3,293716732  | 3,183385808  |
| CG4620  | -4,6 | -4,629532492 | -4,470590291 | -4,668942725 |
| CG12157 | 2,1  | 2,507390384  | 2,172277775  | 1,726585266  |
| CG1322  | -2,2 | -1,972683845 | -2,482778095 | -2,278557385 |
| CG6016  | 3,1  | 3,628487631  | 3,026162847  | 2,761899514  |
| CG3962  | 2,6  | 2,601402244  | 2,79242601   | 2,307263436  |
| CG14981 | 2,2  | 1,905569491  | 2,205342103  | 2,433011641  |
| CG9239  | 3,3  | 3,546682339  | 3,326219405  | 3,161526916  |
| CG31641 | -4,5 | -4,53712358  | -4,797099253 | -4,296779235 |
| CG4822  | -2,3 | -2,406302251 | -2,363863721 | -2,08454972  |
| CG8256  | 3,3  | 3,518012942  | 3,181263627  | 3,348691644  |
| CG15611 | -2,6 | -2,285623345 | -3,111357925 | -2,335105315 |
| CG17077 | -2,8 | -2,39078781  | -2,747790758 | -3,24057007  |
| CG1746  | 2,4  | 2,359951943  | 2,129989946  | 2,697882374  |

|         |      |              |              |              |
|---------|------|--------------|--------------|--------------|
| CG1771  | -3,2 | -3,15476271  | -3,261561966 | -3,194053586 |
| CG15009 | 5,4  | 5,412679047  | 5,530351189  | 5,225424766  |
| CG6794  | -3,3 | -3,115339869 | -3,198291842 | -3,495533417 |
| CG12437 | -2,6 | -2,388632013 | -2,798558216 | -2,709762542 |
| CG11347 | -2,4 | -2,179787732 | -2,800610509 | -2,331392084 |
| CG18619 | -4,6 | -4,599057662 | -4,652298502 | -4,594537488 |
| CG1128  | 2,1  | 2,171628234  | 2,020939299  | 2,070954848  |
| CG9160  | 2,1  | 1,81629599   | 2,177712646  | 2,387105073  |
| CG11466 | -2,3 | -2,345643173 | -2,14578281  | -2,328079048 |
| CG8368  | 2,4  | 1,849798919  | 2,785308886  | 2,510667161  |
| CG7950  | 3,2  | 3,019254392  | 2,58710467   | 4,054803752  |
| CG11660 | 2,1  | 2,196502719  | 2,258579773  | 1,897252428  |
| CG12008 | -3,1 | -3,018815208 | -3,058896126 | -3,361348349 |
| CG17888 | 2,6  | 2,768416973  | 2,58098643   | 2,562817034  |
| CG10082 | -2,2 | -2,173612656 | -2,361463751 | -1,99388155  |
| CG17836 | 2,5  | 2,668123633  | 2,605653453  | 2,24240631   |
| CG5320  | 2,5  | 2,253555652  | 2,716192694  | 2,400934908  |
| CG9328  | -2,7 | -3,252007566 | -3,132661147 | -1,618608357 |
| CG17734 | 3,3  | 2,939639502  | 3,295286891  | 3,655795438  |
| CG18135 | 2,3  | 2,14208235   | 2,988984098  | 1,817616107  |
| CG15547 | -2,2 | -2,007161815 | -2,72641645  | -1,860610389 |
| CG9535  | -2,3 | -2,688259673 | -2,057006581 | -2,288034761 |
| CG1404  | 2,0  | 2,296565481  | 2,061983763  | 1,742029246  |
| CG2206  | -2,1 | -2,262908657 | -1,92272406  | -2,057220845 |
| CG10645 | 3,1  | 2,862432789  | 3,358472096  | 3,186682879  |
| CG33464 | -2,2 | -1,451119698 | -3,253269975 | -1,901066525 |
| CG30084 | -2,3 | -1,899495427 | -2,594601548 | -2,375758572 |
| CG30492 | -2,1 | -2,004158642 | -2,39534953  | -1,896134697 |
| CG10922 | 2,4  | 2,123235965  | 2,41134814   | 2,520817629  |
| CG10120 | 2,2  | 2,419971895  | 2,394116665  | 1,819449906  |
| CG10365 | -2,4 | -2,570280971 | -2,444214845 | -2,33403192  |
| CG3808  | 3,9  | 3,653496168  | 4,51248785   | 3,651087083  |
| CG8772  | 5,5  | 5,526268102  | 5,477333417  | 5,444669108  |
| CG31732 | -2,3 | -2,438929937 | -2,186700531 | -2,317195613 |
| CG3376  | -5,0 | -5,255371239 | -4,856677849 | -4,874663253 |
| CG6647  | 2,3  | 2,501758046  | 2,177108567  | 2,312669035  |
| CG10334 | -2,3 | -2,318691791 | -2,168051229 | -2,41484844  |
| CG16758 | 2,7  | 2,444467792  | 2,711987307  | 3,04917374   |
| CG8448  | -2,2 | -2,122132228 | -2,416796136 | -1,947685097 |
| CG17608 | 4,3  | 4,294737641  | 3,908055752  | 4,744229572  |
| CG4912  | 3,9  | 3,565219354  | 4,182357262  | 3,982204691  |
| CG30015 | -2,8 | -2,446894042 | -3,00980579  | -2,912875498 |
| CG7777  | -2,4 | -2,678455703 | -2,224902019 | -2,208858481 |
| CG1770  | -2,8 | -2,666272754 | -2,686349829 | -3,117360113 |

| cg_list | Wingless_Zscore_ave | Wingless_1_Zscore | Wingless_2_Zscore | Wingless_3_Zscore |
|---------|---------------------|-------------------|-------------------|-------------------|
| CG4551  | 2,3                 | 2,22952478        | 2,056482669       | 2,634844049       |
| CG10497 | 2,8                 | 2,723342699       | 2,670947025       | 3,149967717       |
| CG1225  | -2,5                | -2,531075812      | -2,292366995      | -2,661755243      |
| CG8398  | -2,2                | -1,875529215      | -2,430644628      | -2,251512158      |
| CG9520  | -3,0                | -3,056375345      | -3,182530234      | -2,802619281      |
| CG2139  | 2,1                 | 2,052962955       | 2,247149847       | 1,850970331       |
| CG12919 | -3,1                | -2,549242754      | -2,978951404      | -3,839708783      |

|         |      |              |              |              |
|---------|------|--------------|--------------|--------------|
| CG32626 | 5,3  | 4,341979488  | 5,64220315   | 5,907631091  |
| CG9155  | -3,1 | -3,439632262 | -2,89602042  | -3,108836953 |
| CG3625  | 3,1  | 2,40695948   | 3,376506797  | 3,394865256  |
| CG9739  | 3,8  | 3,944423936  | 4,457363618  | 2,991359413  |
| CG2086  | -2,1 | -2,539058909 | -2,476376614 | -1,266292605 |
| CG10433 | 4,9  | 4,76309151   | 5,090065709  | 4,962246691  |
| CG5201  | 2,9  | 2,948881824  | 2,813128136  | 2,932321128  |
| CG32434 | 2,2  | 2,392338918  | 2,358449274  | 1,97470567   |
| CG18279 | -2,2 | -1,672948422 | -2,289664605 | -2,652597708 |
| CG5547  | -2,3 | -2,310749455 | -2,150226503 | -2,423779033 |
| CG4608  | 4,8  | 5,706860424  | 4,499862989  | 4,047696962  |
| CG32666 | 3,0  | 3,019442764  | 3,316922979  | 2,560944721  |
| CG10579 | 4,8  | 4,849122629  | 4,508776046  | 5,109989851  |
| CG11661 | 2,5  | 2,759420163  | 2,28654044   | 2,553979867  |
| CG10741 | 3,3  | 3,079656486  | 3,698540385  | 3,148910534  |
| CG16987 | 4,4  | 5,344648743  | 4,492064708  | 3,390639526  |
| CG13076 | 21,5 | 20,10738673  | 21,56889803  | 22,69646746  |
| CG7926  | -4,9 | -4,815440314 | -4,366069494 | -5,425365157 |
| CG1572  | 3,2  | 3,625794893  | 2,413621669  | 3,52166242   |
| CG6030  | 2,2  | 2,602666222  | 1,872068122  | 1,97796022   |
| CG33199 | 2,5  | 2,841304036  | 2,335129773  | 2,175577182  |
| CG14253 | -4,0 | -4,503104787 | -3,921943651 | -3,445667199 |
| CG5393  | -2,1 | -2,532667462 | -2,330486879 | -1,409719476 |
| CG6543  | 2,3  | 2,670469913  | 2,198584962  | 2,085579787  |
| CG17090 | 2,6  | 2,389225832  | 2,71226554   | 2,578326595  |
| CG33130 | 2,2  | 2,198440434  | 2,189071591  | 2,127160163  |
| CG3937  | -3,5 | -3,227086778 | -3,77022883  | -3,638128449 |
| CG8222  | -2,1 | -2,266509651 | -1,958023476 | -2,218930483 |
| CG13384 | -2,6 | -2,575405609 | -2,86164492  | -2,335322468 |
| CG7981  | -2,4 | -2,303600532 | -2,172761024 | -2,633522585 |
| CG18408 | 2,3  | 2,309013218  | 2,180718843  | 2,445729858  |
| CG6953  | -2,3 | -1,346946758 | -2,390245511 | -3,269430417 |
| CG5992  | 4,5  | 4,544941741  | 4,396542752  | 4,691742706  |
| CG8468  | 6,6  | 6,292655312  | 5,982623623  | 7,442445893  |
| CG3395  | 3,1  | 3,93219983   | 2,510086754  | 2,964052103  |
| CG9350  | 2,2  | 2,131742043  | 2,138674476  | 2,359745801  |
| CG4212  | 2,7  | 2,830143575  | 2,216652636  | 3,039213308  |
| CG5825  | 2,3  | 2,759540457  | 2,423287505  | 1,667512857  |
| CG11804 | 3,0  | 2,886321736  | 3,069829004  | 2,917067459  |
| CG6692  | 6,2  | 5,406557039  | 6,559680843  | 6,783626393  |
| CG2747  | 5,6  | 5,477049036  | 5,89411143   | 5,379320739  |
| CG7340  | -2,0 | -2,089502934 | -1,439797495 | -2,480301434 |
| CG7023  | 2,2  | 2,403937304  | 1,816446954  | 2,476555121  |
| CG17383 | 6,3  | 5,50439071   | 6,558029886  | 6,721768521  |
| CG7147  | -2,0 | -1,741625244 | -2,603297865 | -1,708680369 |
| CG1322  | 3,4  | 3,455944283  | 4,213470997  | 2,554446065  |
| CG33207 | 2,3  | 2,567419641  | 1,870236549  | 2,611271979  |
| CG17932 | -3,0 | -2,565514279 | -3,227514983 | -3,243239372 |
| CG7123  | -3,6 | -3,499048291 | -3,782836062 | -3,503014617 |
| CG33232 | 7,4  | 7,453866313  | 8,596413973  | 6,152813582  |
| CG4822  | 3,0  | 3,567275168  | 2,735440521  | 2,684337578  |
| CG8256  | 5,5  | 4,62663481   | 6,033932928  | 5,732085159  |
| CG15611 | -3,8 | -3,837295757 | -3,983675312 | -3,690221223 |

|         |      |              |              |              |
|---------|------|--------------|--------------|--------------|
| CG4859  | -4,7 | -3,053974653 | -5,301607766 | -5,692813962 |
| CG11988 | 2,2  | 2,449257223  | 2,030513576  | 2,126399264  |
| CG12002 | -2,6 | -2,315483875 | -2,130395344 | -3,334666014 |
| CG32306 | 3,9  | 4,162562588  | 3,510515092  | 3,907947059  |
| CG7935  | -3,6 | -5,464580781 | -2,909613172 | -2,532173319 |
| CG15828 | 2,8  | 4,157682624  | 2,649064077  | 1,596786159  |
| CG10082 | 5,0  | 4,832925096  | 4,772287954  | 5,245412055  |
| CG1630  | 3,0  | 3,13635646   | 2,568388173  | 3,380020335  |
| CG1471  | 2,7  | 3,080126381  | 2,681995573  | 2,243311791  |
| CG6449  | -3,1 | -2,877419508 | -3,562338082 | -2,824799504 |
| CG30084 | -2,1 | -1,802086673 | -2,086977176 | -2,298761206 |
| CG10960 | 6,1  | 5,346790483  | 6,25544976   | 6,79730764   |
| CG32066 | -2,3 | -2,329547216 | -2,080912385 | -2,393893896 |
| CG4692  | 2,2  | 2,190796402  | 1,863343954  | 2,463570037  |
| CG5923  | 2,1  | 2,32146712   | 2,774242251  | 1,081308508  |
| CG10365 | 2,3  | 2,411475257  | 2,242209527  | 2,195256399  |
| CG8588  | -2,1 | -1,773741601 | -1,702811107 | -2,864791527 |
| CG3376  | -2,5 | -1,911991971 | -1,682589393 | -3,778784526 |
| CG16758 | 2,1  | 1,41495521   | 2,164250959  | 2,841454658  |
| CG11198 | 2,9  | 2,285656837  | 3,803363757  | 2,546613509  |
| CG17608 | -3,9 | -3,388382474 | -3,864140774 | -4,458166541 |
| CG32498 | 9,2  | 8,458419288  | 9,200246636  | 9,803328302  |
| CG7740  | -2,4 | -2,489591838 | -2,381307653 | -2,311110801 |
| CG30015 | 3,8  | 3,340010704  | 4,156950511  | 3,866605747  |
| CG1803  | -6,9 | -6,656458387 | -6,023801152 | -8,035843955 |
