# Supplementary material for: Global analysis of alternative splicing regulation by insulin and wingless signaling in Drosophila cells
Source: PubMed Central journal article supplement (PMC2687788; doi:10.1186/gb-2009-10-1-r11), 2009-01-29
Supplement: gb-2009-10-1-r11-S2.pdf [file gb-2009-10-1-r11-S2.pdf]

| ProbiD | Insulin_avg_Zscore | Insulin_1_z | Insulin_2_z | Insulin_3_z | cg_list | probe_table::seq                       |
|--------|--------------------|-------------|-------------|-------------|---------|----------------------------------------|
| 2503   | -3,795213953       | -4,41       | -4,27       | -2,71       | CG16833 | TCACAAATCGCGAGGCAAAGTGGCATACTATGCATT   |
| 2167   | -2,67428805        | -2,27       | -2,64       | -3,11       | CG3779  | GATCCCGATATATATATATGATCGCGCCCATCAATTTA |
| 9803   | -3,182700166       | -3,50       | -2,53       | -3,52       | CG7450  | TTTCTATGAAAATCGAGTAAAAGCGCATGCAACAAG   |
| 13105  | 3,047838566        | 2,33        | 2,76        | 4,05        | CG3937  | TGGACGGACTTGAGCCAACTGACTTGCGCGTAACCA   |
| 19591  | -3,071113543       | -3,81       | -2,73       | -2,68       | CG3725  | GATTGGATTGGATAGGTGGCCACTGAACGAAGAGGA   |
| 19589  | -2,791024802       | -3,41       | -2,19       | -2,78       | CG3725  | AACAACCTTGATTTATAAAGGCCACTGAACGAAGAGGA |
| 690    | 2,571097436        | 2,84        | 2,38        | 2,49        | CG3365  | ATTCGAGATTCAAAACGCAGCGCGGTCTGACGCCGCC  |
| 17582  | 2,834298354        | 2,52        | 3,19        | 2,80        | CG18076 | GCCGAGAAGCGGATCAAGCAAGCAGTATTCGAGAAG   |
| 7742   | 3,360529791        | 2,67        | 3,92        | 3,50        | CG11486 | TATCTTTTGGATTTTTCAGATACGGCTGCTATGGATC  |
| 6166   | -2,375902553       | -3,18       | -1,85       | -2,10       | CG9177  | CATCAAATATAACAATAAGAAAACACCAGCAAAAAAAA |
| 6943   | -2,533491916       | -2,12       | -2,14       | -3,34       | CG1417  | ATAAATAATAAGAACGAACAACAACCGAGATTGGAG   |
| 12702  | -2,540219015       | -2,20       | -2,20       | -3,22       | CG3731  | GCGCAGCGCAGTACATTGGCTATTGAACGAATTAAT   |
| 7640   | -3,040893764       | -3,14       | -2,90       | -3,08       | CG16758 | GGTTCTCAACGAAGACAGTATCCCTATGAGGTCAT    |
| 3512   | 3,962668583        | 4,69        | 3,39        | 3,81        | CG10334 | AGCTAAATCCCAAAGTAATTTTCTAACACACACACAC  |
| 9940   | -2,396322188       | -1,83       | -2,45       | -2,92       | CG4899  | CTGGCCGCTGGAGCAGCGAAGGTGGCCATCATTGAT   |
| 11759  | -2,984943773       | -3,03       | -2,84       | -3,09       | CG18466 | AAAAGAAGTCACAATAAGCAACATGGCTCAAATTAT   |
| 4877   | -3,989334153       | -4,13       | -4,15       | -3,68       | CG3168  | AGAGAATAGCAACAAGAAACCGCTAAGCGAGGCAGA   |
| 17509  | -2,8185317         | -3,32       | -2,64       | -2,49       | CG4832  | CTCGGATTTACAATAAATAGTCGCTGCAAAATCTA    |
| 7487   | -2,968924539       | -2,33       | -3,43       | -3,14       | CG7995  | AACAATCGAATACAAAAAGCAGCATGCCGAGGGCA    |
| 19194  | 3,111642673        | 2,74        | 3,50        | 3,10        | CG13499 | CACAGAAACGAGGTAGGTGCGAGGTGGAGGCGGCGG   |
| 7708   | -2,423686269       | -2,00       | -2,92       | -2,35       | CG2103  | ACATATGTCTGCGATAAGACCACGTTGCGAGTGCCGC  |
| 14212  | -2,566472275       | -2,24       | -2,99       | -2,47       | CG5854  | CTGTTCTGATTTTGGGTGGCTGCGGCTTCATTGGAC   |
| 7483   | -2,712896373       | -3,16       | -2,94       | -2,04       | CG7995  | GGGGCAGTGCTAATGTGGGCAGCATGCCGAGGGCA    |
| 7644   | -4,771924473       | -4,16       | -5,00       | -5,16       | CG16758 | GCCCCAGGAGAATCCCACCGGCAATGAAAAATCCA    |
| 3509   | 3,527618602        | 3,77        | 3,33        | 3,48        | CG10334 | AGCTAAATCCCAAAGTAAATACACACATCACCCCTA   |
| 15811  | -2,34893186        | -2,43       | -2,50       | -2,12       | CG8276  | TAGGTGTTTTCTAACGTTGGTACATCTCAACGGAGT   |
| 15318  | -3,337784673       | -3,28       | -4,04       | -2,69       | CG7950  | ATATCTGGACGTGAAGATATAATTACGTTTTTAAT    |
| 6948   | 2,563643434        | 2,73        | 2,09        | 2,88        | CG1417  | CGAGAAACGTGAAGTTGAATCTCCGCTCCAGTGC     |
| 3638   | 3,236900476        | 3,48        | 3,03        | 3,20        | CG9326  | ACGATACCTCCGATAACGCCCGCTTCGCAACTCGA    |
| 7037   | 2,776081304        | 2,37        | 3,33        | 2,62        | CG1210  | AATGTGTGCTGCTAGCTGTTAAAGTATGCGAGAAGC   |
| 1137   | -2,780215648       | -3,22       | -3,09       | -2,03       | CG10021 | TCAAAATTGTCCCTTAGTAATCGTATTAACAGAAGT   |
| 14087  | -2,606481584       | -2,93       | -2,66       | -2,23       | CG17894 | GAGCTTCAACAAGATAAAGGACAAGAACATGAGAAT   |
| 16498  | 3,767050837        | 3,45        | 3,94        | 3,91        | CG11804 | AAGTAGCGGACCGTGAAGCTCCCTTAAACGCTTAAA   |
| 8446   | -2,454349543       | -2,19       | -2,45       | -2,72       | CG8588  | GGACGCGAGGTGGGAGCGATCACCCAAGTACTGTG    |
| 18801  | -2,450058138       | -2,69       | -2,21       |             | CG8201  | AAGAAAAAAACACAGAAAAATTTAACAAAGTACTCT   |
| 13310  | -2,670706202       | -3,55       | -2,16       | -2,30       | CG18617 | TAATTCTCGTCGGCGGAGGGAACGTAAGCAGTCGCC   |
| 17075  | -3,339648543       | -2,85       | -4,08       | -3,09       | CG30035 | ATTTGTACCTTCTCCCAGGTCTTGGCTGCTCTGAGT   |
| 8987   | -2,389301993       | -2,83       | -2,62       | -1,72       | CG6767  | TACGATTGGAATTTAGGAGTCGTGCGCCATCTCG     |
| 6016   | 3,25542479         | 2,59        | 2,14        | 5,04        | CG8948  | AGTCCGTTCTTGATGAAAGAAGGATTACCAATATGC   |
| 10045  | -2,493151751       | -2,24       | -2,61       | -2,62       | CG9674  | AAATAATCTACGATCACGTGTGATTGTTCAAGCTGA   |
| 10094  | -2,785409147       | -3,51       | -2,52       | -2,33       | CG11661 | ACTCTGGGTTTTTGTGGCGAGCAGGACATGGATC     |
| 13446  | 3,123692428        | 2,66        | 3,60        | 3,12        | CG31175 | CAAGCGTGGCATTACAGGTGACCCGATTGCGAGAGC   |
| 11407  | 2,988915513        | 3,07        | 4,03        | 1,86        | CG10279 | CGGCAGCATGCGAGCAAAGGCCACACACGATCGCGA   |
| 9145   | -5,191961027       | -5,70       | -5,18       | -4,69       | CG7958  | GAAGCGCAATTCAAAAAGAAAAATGATGAAATGAA    |
| 16895  | -2,4421665         | -2,48       | -2,30       | -2,54       | CG2368  | AATATAAATAGCGAAAAGTACTGCGAGTATACACA    |
| 10602  | -3,135024026       | -3,23       | -2,72       | -3,45       | CG5683  | CAGCCACAAAATGGAAGGCACAGCAGCAACAACA     |
| 17593  | 3,272021661        | 2,43        | 3,63        | 3,76        | CG18076 | TCCACGCAGCGCAGAGAGATCTCCGATATTGTTGTG   |
| 16589  | -3,222170303       | -3,33       | -3,14       | -3,20       | CG1516  | TATGGTACGAAAAGTCAAATACATTTAAGTCCTAGG   |
| 8445   | -5,298595167       | -4,16       | -6,79       | -4,94       | CG8588  | GGACGCGAGGTGGGAGCGAAAGCAAAAGACGGTGAC   |
| 14882  | 2,591733474        | 3,50        | 2,88        | 1,40        | CG14253 | AAGTGGTACGCTACGAACATATAGTAATATGTCTCA   |
| 7740   | 4,490538245        | 4,16        | 4,66        | 4,65        | CG11486 | ATTATCAAATGCCAGTGTATACGGCTGCTATGGATC   |
| 1188   | -2,330284038       | -2,19       | -2,87       | -1,93       | CG3714  | GGAACGGATCAAAAAACCGACAATTGCAAAACAAT    |
| 16060  | 4,079590883        | 3,61        | 4,77        | 3,87        | CG1600  | CAATTCACAAGTAAAAGTTGGAACAACAGATACCTC   |
| 5723   | 3,043356608        | 3,09        | 3,08        | 2,96        | CG1771  | ATGTTTCGGATATCACATTTGTTTTAGTGGGAGCTCC  |
| 2091   | 3,160478506        | 2,64        | 3,86        | 2,98        | CG12437 | GGTTAAATTTCTCTCAGAGAAGTTCTGAATGCATG    |
| 16171  | -2,43895671        | -2,97       | -1,36       | -2,98       | CG1882  | CATAGCCAGCGGCTAGAGGATCCCGCAACAATAGA    |
| 18456  | 3,701203422        | 3,73        | 3,99        | 3,39        | CG33130 | CGAAGCGGACGAGAGAGGCGATTTTGTGCTGCGG     |
| 14959  | 2,985080559        | 3,19        | 3,34        | 2,43        | CG5643  | AAGTCCGGATGCTCGAAGTGAACACCAGCAAGCAGC   |
| 3052   | 2,998508471        | 2,34        | 2,90        | 3,75        | CG31732 | GAAATACCGAATTTCTTGCTGCACGAGATCACCCGG   |
| 1136   | -3,004476806       | -3,47       | -3,17       | -2,37       | CG10021 | GCTAGTGTGTGTGTGTGTAATCGTATTACAGAAGT    |
| 12382  | -3,650474057       | -5,27       | -2,88       | -2,81       | CG10120 | AAATTTTCGATGAAAATGGCAGCGGTTTTATCCAC    |
| 13470  | -6,316767204       | -6,66       | -6,03       | -6,26       | CG6231  | CATATATAAATAACTACAGACCAAGCCAAAGGAACAA  |
| 19102  | -2,356950707       | -2,15       | -2,83       | -2,10       | CG9696  | CAGCCACAACGCAACAGCCATGAGCGATCTAACTG    |
| 9171   | -2,38273921        | -1,89       | -2,40       | -2,86       | CG7888  | ACAGCAACAACAACACCATCATGACCAAGAATGGAC   |
| 5447   | -2,627428631       | -3,03       | -1,86       | -2,99       | CG1743  | GTGCATTGAAAAATCAGTATGTCCGCTAGGATCCT    |

|       |              |       |       |       |         |                                       |
|-------|--------------|-------|-------|-------|---------|---------------------------------------|
| 12780 | -5,279569592 | -4,25 | -6,31 |       | CG4898  | AATTACCCAAAAATTAACAAAAACACAAGTGCAGC   |
| 15158 | 2,733985346  | 3,05  | 3,70  | 1,46  | CG2005  | GTGGCCATGCAAAAAGAGTGCCAAAATGGAAATCAT  |
| 16280 | -3,209571573 | -3,36 | -3,34 | -2,93 | CG11546 | CGACATCAAAGCACGAGAATCAGTAACAGGATCAAG  |
| 6937  | -5,139591129 | -4,36 | -6,33 | -4,72 | CG32527 | GGCAATAATATCATTCAACGTAATATGTTTGGAT    |
| 5804  | 2,67894396   | 2,57  | 2,44  | 3,03  | CG11111 | AAATCCGCGGCGCAGAAGGTACCTGGAAGAAAGAC   |
| 14530 | -2,63399259  | -3,54 | -1,72 |       | CG13636 | AGGAACTTATTTTTACATTTAAAGGACGAGAGTGCA  |
| 3507  | -3,03906259  | -3,52 | -2,79 | -2,81 | CG10334 | GGGTGTTTTTGTGTGCATATACACATCACCCCTA    |
| 14900 | 4,030980834  | 3,56  | 4,26  | 4,27  | CG6134  | ACTATCCGGACCTTTCAGACGAGCGATTCTTTGCA   |
| 5829  | 3,073891493  | 2,89  | 2,20  | 4,13  | CG32626 | GCGACATGTAAGTCGCCAGTGATCTCGCCGATTAC   |
| 13095 | 3,378130006  | 3,71  | 2,79  | 3,63  | CG3937  | CTCTCTAGCAGAGGAAAACCTGAAGTCAGAATGCCTA |
| 13473 | -5,807987829 | -6,07 | -4,97 | -6,39 | CG6231  | CTTGCGGCGCATCTCTGGACCAAGCCAAAGGAACAA  |
| 14221 | -3,431097273 | -2,87 | -4,23 | -3,19 | CG5320  | GCATGTATCACCTGAAGAATCAACCCTAAGGAGTAC  |
| 10603 | -4,115304625 | -4,11 | -3,98 | -4,26 | CG5683  | AAAGCCCGCCAAAAAAGGCACTAGCAGCAACAACA   |
| 14905 | 2,673017648  | 3,07  | 2,78  | 2,17  | CG6134  | CCAGATCAGTACTTCAAAGGACGGACACGGAGGTG   |
| 7738  | 4,002530412  | 3,12  | 4,33  | 4,56  | CG11486 | ACAATTTCTTCCCGCAGATAATGTGCTCGACTTAT   |
| 12712 | 2,922603068  | 2,78  | 2,45  | 3,54  | CG6904  | GTCGACAATTGTTCAACTATGAATCGTCGCTTTTCG  |
| 13220 | -2,900162065 | -2,24 | -3,24 | -3,21 | CG31243 | CCGAATAATAACAAACTAAGCATCAAAGTGAGGAT   |
| 10488 | -2,622396458 | -2,68 | -2,53 | -2,66 | CG32425 | GTGGAACAAGGCAGCAGTTAATTGCAACTCGAAGG   |
| 3791  | -2,902628114 | -2,53 | -3,65 | -2,53 | CG2201  | CAGCATTTCATAGCAATGCCACCCCTGAGGAAATT   |
| 14411 | 3,474927353  | 2,82  | 3,66  | 3,95  | CG6643  | TAAGTAAACCGTCTTAAGCGATAACAGTCCATGGT   |
| 17622 | 3,528885034  | 4,40  | 4,37  | 1,82  | CG6692  | TCGCAGAGGGCACAATTGATTCCAGAACAATCACA   |
| 16775 | 2,616832148  | 2,03  | 2,64  | 3,18  | CG18408 | TACCGCCTTCCGTCCAGGCCCGTCCGTGCTACAAGA  |
| 7616  | 2,698857208  | 3,10  | 2,84  | 2,15  | CG32306 | ATTTTCCCGATATCGAAAAACCATTGCGGCCTCAA   |
| 5349  | -4,976662377 | -4,62 | -5,75 | -4,56 | CG16944 | GAAACACAAATACAAATTTGAATCGTACATCCACTA  |
| 18568 | -2,675007718 | -3,37 | -2,56 | -2,10 | CG5119  | ATCGAGCGTGTGTTGAGAATGGTCTAGGAATGTTG   |
| 2490  | -2,532351346 | -2,99 | -1,32 | -3,29 | CG6647  | TTGTGGTCATGTGAGGAGATGGCTCCTCCATCATAC  |
| 10487 | 3,187999461  | 2,84  | 3,81  | 2,91  | CG32425 | TCTCCTGCTTAAAGCCTGCACCGCCAGCAACGTCG   |
| 13090 | -3,023117988 | -3,36 | -3,39 | -2,32 | CG3962  | CCAGGGAGAGCAATGTAAGGCTGAGATGAGCAACA   |
| 14216 | -2,455476117 | -2,33 | -2,28 | -2,75 | CG5320  | AAAGAATCATTAATGACGAATCCGTTCAAGAGTCCC  |
| 13604 | 3,653438036  | 4,29  | 3,08  | 3,59  | CG4257  | AAAAAGGCAATCTGAAAGTTTCTCCTTCAACCAT    |
| 14901 | 3,553918469  | 3,57  | 4,05  | 3,04  | CG6134  | CATGCCCATACCCACCCAAAACCTTCTGCACGAATGT |
| 16789 | -2,73167048  | -2,30 | -3,08 | -2,82 | CG18408 | TGAAGGTAACCTGTCCAGAGCTTTGGCCAAGGAATC  |
| 7641  | -2,433503597 | -3,41 | -1,38 | -2,51 | CG16758 | AACTCCAGAAAGTCTGCTGTATCCCTATGAGGTCAT  |
| 13610 | -2,693055443 | -2,70 | -3,03 | -2,35 | CG4241  | GTGCTAACAAAAACAAAGTCCCCAGTCCGAGTCT    |
| 13748 | -2,449587037 | -2,33 | -2,57 |       | CG17299 | GATATAAAGATTTATTAGTTTTCGGCGAGCCGCACA  |
| 9424  | -2,407906253 | -2,94 | -2,16 | -2,13 | CG32103 | CGCGGGGAAATTTCGATACAGCTACTGTTTTCCATTT |
| 8035  | -4,679520129 | -4,62 | -4,33 | -5,09 | CG15009 | CCCTGATTAATGGAGGCGAAAATGAATTTACATGTG  |
| 9292  | -3,792635473 | -3,06 | -5,01 | -3,31 | CG11658 | AGCCACAGCAATTTCTCGTTAAATCAAACGCGTTTC  |
| 5143  | -4,032638321 | -3,92 | -3,29 | -4,88 | CG12737 | AAATATATCGAGCATAAGTCCAGCTTGACGGGCAA   |
| 17569 | 2,57695391   | 2,69  | 2,46  | 2,58  | CG18076 | AGAACGATCCTTGTGCGCGGACGAACACTTGGCCG   |
| 5325  | 3,864612934  | 3,30  | 4,79  | 3,51  | CG33175 | GTGATGGATGCCATAGCCTGCTCAGCTCGCTGGCC   |
| 2869  | -2,346999154 | -1,93 | -2,48 | -2,63 | CG16885 | GAGCGAACCAACCAACAACAACCGCCAACGTACGAC  |
| 18566 | -2,42615383  | -2,55 | -2,09 | -2,64 | CG5119  | CATCGAGAACGAAAAGAAGTAGACCTGATCACCAAA  |
| 10494 | 3,010928025  | 3,04  | 2,96  | 3,03  | CG5059  | CCGGCTAACGAATCGAACAATCTTGATCGAACTCA   |
| 15545 | 5,986221963  | 6,27  | 6,37  | 5,32  | CG11525 | AAACGCGAGGGCATCCGGCTCGTAAGTTTTATTTG   |
| 11080 | 2,853559026  | 2,79  | 2,87  | 2,91  | CG9765  | CAAGCCATGAGTGGCGAGTGATCCGTTGGCGGTG    |
| 17917 | 2,682192596  | 2,52  | 3,34  | 2,20  | CG30084 | ACGGCTGTCTGTGAGAAAGTGCACAGGAGGCTCAAA  |
| 8577  | -2,462798336 | -2,68 | -2,25 | -2,46 | CG17888 | TTAGCCAGCCAGCTCAGGCAGGAAATCTCCGTTTT   |
| 647   | 2,552030255  | 1,94  | 2,34  | 3,38  | CG4280  | CGCATATAAACGCTTCTGGCACCAAAAGGTAAGGGA  |
| 16793 | -2,557762717 | -2,50 | -2,12 | -3,05 | CG18408 | ACACCGTTCGACGGATCAGACGTGAACATCCACTCA  |
| 532   | -2,969276067 | -2,95 | -3,27 | -2,69 | CG2674  | CCTTTGTTCAAACCCACACTCCACCAACAATTTAGC  |
| 18850 | -2,403334858 | -2,47 | -2,11 | -2,63 | CG9854  | CTACACAGGAAGAAAAGGCATTTTTATTAAGCGCAGT |
| 12485 | -2,378522543 | -2,84 | -1,68 | -2,62 | CG8863  | TTCTACAAAAAAAATGGTAAACAGCAAAACAAATG   |
| 7737  | 3,91967329   | 2,95  | 2,99  | 5,82  | CG11486 | CTCATTAAAGTAATTACGTGACGCGCCTCAATTGT   |
| 11687 | -2,379896395 | -1,56 | -2,26 | -3,32 | CG8036  | TAGAGGTGACCAGCTCAACCATCCACATCATGTGC   |
| 537   | -3,10278466  | -3,17 | -3,08 | -3,06 | CG2674  | AAGAATACACCCCAATGACAAAATGTGCGACCCAAA  |
| 6430  | -3,177480716 | -2,66 | -3,44 | -3,43 | CG5172  | ATGGAGGTGGCAATCAAGGTGGCCACGAGGACAAG   |
| 15542 | -3,603564985 | -3,55 | -3,47 | -3,79 | CG11525 | CAAATGGCTGTAAAAACGTAAGTGGCCAGCCCTCA   |
| 17344 | -6,052627427 | -6,49 | -5,55 | -6,13 | CG8772  | AGAGGATAATGCCAAGCTCAGTCAGAGACGCCACTA  |
| 2634  | -3,759659553 | -3,57 | -5,08 | -2,62 | CG6756  | GTAAGTTTTTAAAAAAGTTTCATCACACATAACACA  |
| 16907 | 3,264944413  | 3,88  | 3,39  | 2,52  | CG2368  | CTGGCTTGGCGAGAAAGATGCATTAAAGAACCCAAA  |
| 16989 | 3,778521638  | 4,03  | 3,62  | 3,68  | CG12313 | ATTGTGCGCCTTTAAAAATAAGAGCTAAGTAGATGAT |
| 10091 | -2,655696096 | -1,89 | -2,71 | -3,37 | CG11661 | TTCCGCGACACAGCTACCCCTTGAACCAGATCTTC   |
| 14427 | 2,958310599  | 2,92  | 2,93  | 3,02  | CG13624 | TCGTTTTTATACATTCAGTTGGCATTAAATAGTG    |
| 19932 | -2,326499812 |       | -2,70 | -1,95 | CG9380  | CATTGTTGACTATATAGCTTATGTTATACAGCAGCT  |
| 11294 | 3,13772617   | 3,34  | 3,54  | 2,53  | CG2922  | ATATCCTTGGGTGAAAGCCAATTTATTGTATGAGTC  |

|       |              |       |       |       |         |                                        |
|-------|--------------|-------|-------|-------|---------|----------------------------------------|
| 17431 | 2,616825842  | 2,52  | 2,91  | 2,42  | CG17054 | AAGCTGATGATCGGCAATGCTTTCCGGCGCAACATG   |
| 1953  | 3,147290607  | 2,95  | 3,13  | 3,36  | CG8222  | CGATCAATGAACAACAATTGCCTTTGCAGCAGTTCT   |
| 7633  | -2,420644152 | -3,47 | -2,05 | -1,74 | CG1146  | GACACCACTTGAAGAAAGAGTGTATGTATGTCATAA   |
| 17807 | -2,866357282 | -2,29 | -2,65 | -3,66 | CG8095  | GAGCCTGCGACCCAATGGCATCATTGTGGGAGCCCC   |
| 4375  | 2,547567704  | 3,51  | 2,26  | 1,87  | CG7981  | TGAGGAAGCGCAGCTTCGGCGCTACCCCGCCACCCA   |
| 3840  | 3,374365514  | 4,14  |       | 2,60  | CG2238  | CGACTGTGAAGACTTAGTGTCAACTTCACCGTCGAC   |
| 1949  | 2,853186433  | 2,92  | 3,40  | 2,24  | CG8222  | GAGATGACCAGCATAGAAAAGACGGCAAACCGCTGC   |
| 5326  | 4,344231981  | 4,11  | 4,86  | 4,06  | CG33175 | GGCATTGGCGTTCCCTGGCGGCAAAGGAGCACGTA    |
| 10339 | -2,561657213 | -3,06 | -2,65 | -1,97 | CG8533  | CCGGTTATATATTCCAAGATCAACCTAACATCCTGG   |
| 12381 | -3,352454149 | -3,29 | -3,28 | -3,49 | CG10120 | CAGAAAACTTTTGGACCCACGCCGGTTTATCCAC     |
| 13471 | -4,577166928 | -4,47 | -4,81 | -4,46 | CG6231  | TATCTGGCCTTTAAAAGTACCAAGCCAAAGGAACAA   |
| 13509 | -4,42167155  | -4,37 | -4,81 | -4,09 | CG4608  | TTCGCTCTACTACGATTTCTGTGTCTGCAGCTAAT    |
| 5033  | -5,198272891 | -6,16 | -5,18 | -4,26 | CG2252  | CATATGAAAAAGCTAAAATTGCAACTTTTAAACAAT   |
| 13410 | -2,575963902 | -2,44 | -2,50 | -2,78 | CG5558  | GGAGCCAAAGAAAGAACAACCTTGGCGGAGGCCTTGA  |
| 1364  | 2,705674283  | 2,72  | 2,39  | 3,01  | CG14029 | AGTCATAAATACGGCTAATTCGCCGCATCCAAGCTC   |
| 8574  | -2,962225374 | -2,88 | -3,06 | -2,94 | CG17888 | TTCAGCCAGCCAGCTCAGGCAAATCCACATCGAATA   |
| 2502  | -2,422502768 | -2,42 | -2,60 | -2,25 | CG16833 | TTTGCTATTAGTTATATTTTTTGCCTCCATTTTAC    |
| 15701 | -3,979083643 | -2,37 | -3,74 | -5,83 | CG30438 | ATATCAATAAAAAAAAAAACAACATGCTTAAAAAAAT  |
| 5346  | -3,33794831  | -3,52 | -3,54 | -2,95 | CG16944 | ATCCATAACATCACAAAGCAAAATGGGCAAGGATTT   |
| 15258 | -2,584601538 | -2,39 | -2,87 | -2,49 | CG7816  | TGTTACAGCTGAATAACGCCGAGTCAATCATCGATCA  |
| 17341 | -4,420463106 | -4,42 | -4,86 | -3,97 | CG8772  | CCACTATTTCGATGCGGCCCATCGCGAGCAGGAGCA   |
| 10722 | -2,545502643 | -3,42 | -2,03 | -2,19 | CG7145  | GCCTGAAACTCACAAAAATAGCAAATTTCTAGGTG    |
| 12970 | 2,619935724  | 2,80  | 2,73  | 2,33  | CG6963  | TTCACCGGAGTCCACCGGTGGCGGTGGCCACAAC     |
| 16880 | 2,537551015  | 2,29  | 2,65  | 2,67  | CG12052 | AGCAACGGGATCCCCAAGATTTCCGTACTAACCTGGT  |
| 10183 | -3,424295293 | -3,17 | -3,85 | -3,25 | CG3979  | TGACTAATCATCACCGATCTACAGCCACCGCCA      |
| 3107  | 3,212470787  | 3,49  | 2,70  | 3,44  | CG12448 | TGCATTAAGGGAATCTGATCTGCTAAGTAAGATCGA   |
| 7484  | -2,614821752 | -2,89 | -2,96 | -2,00 | CG7995  | GGGGCAGTGCTAATGTGGCATGACCGAGGGCAAGAA   |
| 13472 | -5,124714494 | -5,49 | -5,01 | -4,87 | CG6231  | AGAGTTTCTCACAGGCCAAGCAAGCCAAAGGAACAA   |
| 5803  | 2,791471964  | 2,69  | 3,18  | 2,50  | CG11111 | AAATCCGCGGCGCAGAAGGCTGCATGAACAAGCAAC   |
| 7481  | -3,414504373 | -4,35 | -2,15 | -3,74 | CG2086  | CTGCAAAAAGAAGAGAATATATAACGTAGACGGTTGT  |
| 204   | -2,80733677  | -2,52 | -2,46 | -3,44 | CG1507  | ATGGCATCTCAGGATCAAAATATAATGTTGCAAAATA  |
| 2106  | 3,341987814  | 2,98  | 3,90  | 3,14  | CG9520  | AAGGAAGAGCAAACGAAGAAAATGTAAGGAGAAGCT   |
| 2814  | -3,389205207 | -4,69 | -2,20 | -3,28 | CG9239  | TGCAGTCTTTGCTCAGACGAAGTGTAAATCGACA     |
| 1510  | -2,361338628 | -2,42 | -2,38 | -2,28 | CG31641 | GAAAAAGTTCAAAACTCGAACGTCGCGCTGAGCTC    |
| 17806 | 2,559031267  | 2,88  | 2,44  | 2,36  | CG8095  | TGTCATCCGCCAGACCAGCATATTGTGGGAGCCCC    |
| 6981  | -3,984908466 | -3,99 | -3,05 | -4,91 | CG14619 | CTAAACGACAGCAGCAAGACGTTGGCGAGAAGTGGC   |
| 11685 | -3,568917728 | -3,28 | -2,32 | -5,10 | CG8036  | AAAGCTAATAAGGATAAGCGCCGACGATAGACGATA   |
| 5293  | -2,352437052 | -2,48 | -2,28 | -2,30 | CG32684 | AAAGGAGAGCGAAGAGAAAGAACTGAGAAAACATA    |
| 12851 | -2,742265933 | -2,93 | -2,69 | -2,61 | CG14869 | ATGAAGCGTATCAGTGAGTTTGATACGACCACGCAG   |
| 13967 | -3,629333517 | -4,57 |       | -2,69 | CG7059  | AATGCGCGAAATTCAGGCCTCCCAATTTATGACGAA   |
| 13091 | -3,433743732 | -3,43 | -4,48 | -2,39 | CG3962  | AAATAAATAAATACAGATAGGCTGAGATGAGCAACA   |
| 10935 | 2,730819249  | 3,04  | 2,52  | 2,64  | CG1106  | ACAGCCGTTTCAAATAGACCTGCTTGTGTTTTTGGC   |
| 9000  | -3,234480971 | -2,91 | -3,24 | -3,56 | CG18177 | CGAAATGTGAACAAGGAGGACAAGGGCATCTGCCG    |
| 3008  | -2,849398639 | -2,21 | -2,95 | -3,40 | CG4170  | GAAACACTGAAAATTAAGAGCAAAAAGGCAATTTAAA  |
| 7642  | -2,546223694 | -2,35 | -2,01 | -3,28 | CG16758 | CACTCCACAGAGCCTGCTGTATCCCTATGAGGTCTAT  |
| 12216 | -4,481058199 | -4,09 | -4,84 | -4,52 | CG17342 | AGGCAGCAACATGTTAGACGGCAGAAATGAGCTGA    |
| 1955  | 2,966861103  | 2,35  |       | 3,58  | CG8222  | CAGAAACACCCAAATAAATGCAACGCTAAGTGAGCA   |
| 8072  | 4,05059997   | 4,12  | 3,16  | 4,87  | CG11347 | ACATTGTGGAGAAGGAAGACGAGGAGGACGACTCCC   |
| 4879  | -4,374000131 | -5,24 | -3,72 | -4,16 | CG3168  | GCGGAAAACAGCCACAAAACCGCTAAGCGAGGCAGA   |
| 5368  | -2,609194405 | -1,61 | -3,16 | -3,06 | CG1637  | ACCCAGTATATACATCGTGTGACGCTGTCCACCTG    |
| 8189  | -3,142470765 | -2,83 | -3,05 | -3,55 | CG10645 | AAAATCACCGAGAGCAAGTTCTTCAAATGGGTTGAC   |
| 10961 | -3,11168404  | -3,61 | -2,61 |       | CG32490 | AGCTCGACGATTTTACAAAACCTGAAAAATCAAATAG  |
| 20057 | -2,650337348 | -3,17 | -2,37 | -2,41 | CG11961 | GAGGAGAAAAGATCGAAGGCTCAGCCCAATGGCTGT   |
| 10496 | -4,536445185 | -4,49 | -4,32 | -4,80 | CG5059  | GCGAAGATTTGCTGGGCGAATCTTGGATCGAACTCA   |
| 10505 | -2,934094931 | -3,43 | -3,47 | -1,90 | CG4365  | TTGGAGAAAAAACAACCTTGCAAAAACCTACGAAAAAG |
| 3396  | 2,610177086  | 3,38  | 2,50  | 1,94  | CG10473 | TTTTCTTATCAAGAAAAGATCTTTCCAGCGCTCGCAG  |
| 2926  | 2,923788355  | 2,86  | 3,14  | 2,77  | CG4551  | AATTGGTCTGTCATAAAGAAATCTTTATGTTTTGCG   |
| 3510  | 2,940877937  | 3,67  | 2,66  | 2,50  | CG10334 | CGCACACACACACGCATGTTTTCTAAACACACACAC   |
| 2082  | -2,54615235  | -1,93 | -2,93 | -2,78 | CG9310  | CTGGCCATTGAGCTTTAATTGCCGTCATTACTTCA    |
| 16159 | -2,608931093 | -2,66 | -2,40 | -2,77 | CG1553  | GTAATAAAAAAACTCGTGAACCTTCCAGAAATAGAA   |
| 4771  | -2,330733036 | -1,43 | -3,34 | -2,22 | CG3187  | GCATCTCGACGGAATCGGATTGACTTCCAAAAGCTT   |
| 6334  | -2,579082471 | -2,74 | -2,34 | -2,66 | CG4429  | TGAATAGAGGATACAATGATCGGCGCAAAATCGTG    |
| 11295 | 3,031413127  | 2,59  | 3,57  | 2,94  | CG2922  | GCTCATAAGAAAAGAGAGCAATTTATTGTATGAGTC   |
| 10184 | -2,653012678 | -2,38 | -2,91 | -2,67 | CG3979  | ACCGAACTACAAAATGATCTACACGCCACCGCCA     |
| 14162 | -2,842067027 | -2,65 | -3,21 | -2,67 | CG10365 | GTACAAAACCACTACAAAATCTCAATTCACCTTGG    |
| 13096 | 2,639058007  | 3,11  | 2,32  | 2,48  | CG3937  | CAATTGTAACACATCAAGCTGAAGTCAGAAATGCCTA  |

|       |              |       |       |       |         |                                       |
|-------|--------------|-------|-------|-------|---------|---------------------------------------|
| 7890  | 2,795182781  | 2,46  | 3,01  | 2,92  | CG12008 | TGCGAACGAGTTTGCAAAGTTGGGGAAATACACGCT  |
| 926   | -2,44361289  | -2,59 | -3,23 | -1,51 | CG16987 | AATGGATTATTAATTTGGACGAAACTTAACGAAAAG  |
| 18960 | -2,718917707 | -2,19 | -3,25 |       | CG3216  | CATCTGTCTTCTGCAAAAGCAGATGAAGCTCAGCAA  |
| 3010  | -4,129208439 | -4,24 | -4,37 | -3,77 | CG4170  | AAAAAGTATCCATAGATGAGCAAAAAGGCAATTAAA  |
| 16448 | -2,687229368 | -2,68 | -2,71 | -2,67 | CG8026  | GGGCTCATGGCAGCTTGAGTTTGAGGGCTACAGAGG  |
| 1739  | 4,36512876   | 3,86  | 5,12  | 4,11  | CG5973  | TTTGTGTGATTTTTGCGCTTGAACCGGTGAACAAC   |
| 9351  | 4,268197793  |       | 4,56  | 3,98  | CG6928  | AAACATTTGTTTAAATACAAATAGAAGCCATGAGCC  |
| 18221 | -2,368499851 | -1,85 | -2,49 | -2,77 | CG8098  | TGGAGCAACAGCCGCAGAGATGCTTTGCCACCCGGT  |
| 16449 | -3,081924243 | -2,89 | -3,73 | -2,62 | CG8026  | ACGCCAACATCTGCATGCCTGCGTCTTTTCATTTG   |
| 12486 | -2,486880293 | -2,13 | -2,99 | -2,35 | CG8863  | AAACTTCAAAAATTTTCGTA AACAGCAAAACAAATG |
| 7734  | 2,57196327   | 2,22  | 3,29  | 2,20  | CG11486 | CAAAGTGAACATGACTGTCGACGCGCCTCAATTGT   |
| 8579  | -4,551029173 | -4,99 | -4,11 |       | CG17888 | TTCTGAGAATAAGAAAAGCACAAATTTTTTTTCAGA  |
| 9622  | -2,404621855 | -3,05 | -1,05 | -3,11 | CG17364 | GTGGATGAAAACCAGGAGTATCCTCCCCGGCTGGAA  |
| 19723 | -3,916302818 | -5,18 | -3,51 | -3,06 | CG3318  | ATCGTCGTCAAGGATCGTCCAGAGAACAAGAGATCC  |
| 11134 | -2,708200655 | -3,19 | -2,15 | -2,79 | CG31543 | GGAACTTTTGGACAAGCGTGAGCGCCGCTATGAGGA  |
| 19222 | -2,537899103 | -2,45 | -2,86 | -2,30 | CG13503 | ACAAATCAGCGGAAACGATGGCTATTCCGCCACCC   |
| 17941 | -2,639872207 | -2,55 | -2,60 | -2,76 | CG8256  | TAGCATCCAGAGCACTAGCCCAATAAATACTCGAT   |
| 10632 | 2,896323096  | 2,46  | 3,05  | 3,17  | CG7611  | TTAAGAAATGCTTTTACGGAATATAATGTGCTATAC  |
| 8071  | -6,97595766  | -6,07 | -6,15 | -8,71 | CG11347 | GTTTTGCGCATCCATAAGCTTCTACGCTACGAAGAA  |
| 20044 | 2,54706282   | 2,29  | 2,67  | 2,68  | CG11949 | AAGTCCTCAGGCAGACGTGCTGATGCTACACCACC   |
| 5322  | 4,713256613  | 5,43  | 4,42  | 4,29  | CG33175 | CCAGCGAATGCATCATGGAACAAGTGAACCCATTCC  |
| 5350  | -2,80375488  | -3,13 | -1,69 | -3,59 | CG16944 | AGAAGTTATCAACTGAAGTGAATCGTACATCCACTA  |
| 12170 | -2,519199561 | -1,69 | -2,96 | -2,90 | CG31305 | GACACGAGCTGATCACCTAATTTCCACCTAACA     |
| 11583 | -3,024189132 | -2,15 | -2,98 | -3,94 | CG32466 | ACGCGTTACCGGACAAGGTGGCCTGGGCTGTTGGCGC |
| 8989  | -3,126236548 | -3,61 | -2,95 | -2,82 | CG6767  | CAAGATAAAAAAGACAAGTTGGCAGGAGTGAAGAT   |
| 7482  | -4,468792572 | -4,54 | -4,45 | -4,41 | CG2086  | ACCGTCTTCTTGCCAAGTTGAATCCGGTTTAACTCT  |

| ProbID | Wingless_avg_Zscore | Wingless_1 | Wingless_2 | Wingless_3 | cg_list | probe_table::seq                       |
|--------|---------------------|------------|------------|------------|---------|----------------------------------------|
| 13603  | 3,001204712         | 2,88       | 2,49       | 3,64       | CG4257  | GGTGGTTGTGTACCAAAGTTTCTCCTTCTAACCAT    |
| 13105  | 2,257054194         | 2,70       | 2,33       | 1,74       | CG3937  | TGGACGGAAGTTGAGCCAACTGACTTGGCGGTAACCA  |
| 17665  | -3,542617306        | -2,74      | -3,93      | -3,97      | CG8468  | GAACAAGAACAGATAAAAACCACATCAAATTTCTTTG  |
| 4868   | -2,221214652        | -3,17      | -1,70      | -1,80      | CG4523  | AAATTGGCTGCCAGGCAACCCACACAGATATCGAAA   |
| 14671  | -6,269928408        | -5,25      | -6,90      | -6,66      | CG17383 | TAACAATTCATGGGTCAATATCTCGAATTCGCAATAT  |
| 12702  | -2,268328007        | -3,16      | -1,81      | -1,84      | CG3731  | CGCGAGCGCAGTACATTTGGCTATTGAACGAATTAAT  |
| 13098  | 2,391799477         | 2,94       | 2,89       | 1,35       | CG3937  | CTAGTCGATTGCCAAGTTTGGCTGTCCAGAGAAAAGC  |
| 11643  | -4,80426179         | -5,15      | -5,45      | -3,82      | CG2747  | TGTGCACGAAGTGAACCGATCGTTTATAAACAGCGA   |
| 18369  | 2,452900807         | 2,55       | 2,56       | 2,25       | CG15611 | TCTGCTGGACAGCGATAGCCACGAGGATGAGGACAC   |
| 5315   | 5,705388651         | 5,40       | 5,40       | 6,32       | CG33175 | GGCAGCGGATCCCTGGACTGGCGCTCCAGCTGCCTT   |
| 12172  | 2,794898354         | 2,19       | 3,20       | 2,99       | CG31305 | CCCATCATTCACTTTTCGGCGCTGGTCTGGTGACGC   |
| 16498  | -2,283236873        | -2,15      | -1,57      | -3,12      | CG11804 | AAGTAGCGGACCGTGAAGCTCCCTTAAACGCTTAAA   |
| 8446   | -3,320188427        | -3,66      | -2,49      | -3,81      | CG8588  | GGACGCGAGGTGGGAGCGATCACCCAACCTGACTGTG  |
| 15148  | -3,298119373        | -4,06      | -3,06      | -2,77      | CG11956 | ACTGAGGCTCTGGCAACGATTATACTTTCTCTATGC   |
| 7614   | -3,044670612        | -3,85      | -2,12      | -3,16      | CG32306 | AATTCCTGGTCTGTGCAGGTGAGTACGACCAGTTT    |
| 8445   | -5,765525642        | -5,86      | -5,13      | -6,31      | CG8588  | GGACGCGAGGTGGGAGCAATAAGCAAAAAGACGGTGAC |
| 14882  | 4,578310197         | 6,02       | 2,96       | 4,76       | CG14253 | AAGTGGTACGCTACGAACATAGTAATATGTCTCA     |
| 7902   | -3,172873749        | -3,92      | -3,12      | -2,48      | CG10579 | TTTTCAAAGTGCAGATATTCGGAGCGCGAAGTGCGG   |
| 1536   | -3,09135574         | -2,87      | -3,34      | -3,07      | CG11050 | GGAACCTCTTGCACCCAGACGCCACTTGCACATCAC   |
| 12629  | -3,963441275        | -4,21      | -4,60      | -3,08      | CG8651  | GCAACAACAACAACAATAAGCGCGCTTGACCCGAA    |
| 608    | -3,926109294        | -3,09      | -4,14      | -4,55      | CG3625  | CTAACGTTCTGGATGCGATAATTCAGGCACTGTAC    |
| 7901   | -3,517977317        | -3,83      | -3,14      | -3,59      | CG10579 | CAACAAATGCTAAAGATGGCGTCAACATGCGCGAGA   |
| 14669  | -4,770487098        | -3,82      | -4,93      | -5,56      | CG17383 | GCTTGTGTTTGTGTTGTCGATCTCGAATTCGCAATAT  |
| 19110  | -3,08026105         | -2,83      | -2,48      | -3,93      | CG10497 | AAATACGAGAGGAAAAGCCGCGCGCAGATACGATA    |
| 5829   | -4,224020762        | -3,79      | -4,20      | -4,68      | CG32626 | GCGACATGTAAGTCGCCAGTGATCTCGCCGATTAC    |
| 9880   | 3,357943863         | 3,24       | 4,28       | 2,55       | CG32156 | CGCCACTGCCTCCTGCGGATTTGTGAGCATAGCTCG   |
| 14221  | -3,344400782        | -4,04      | -3,30      | -2,70      | CG5320  | GCATGTATCACCTGAAGAATCAACCCTAAGGAGTAC   |
| 12823  | -2,59576777         | -1,88      | -2,39      | -3,52      | CG31302 | GAACCATATCAAAGAGTGAACCTCGAAGAAGAAGTGA  |
| 14453  | 2,237544108         | 2,73       | 1,75       | 2,24       | CG5794  | AGAATCTCCTGGAGCTCTATGAGGTGCGCGTGGCCA   |
| 7900   | -2,954863186        | -2,65      | -3,08      | -3,13      | CG10579 | GCCAGTAAAACGTGCAGCTGACATACGCATACAAA    |
| 13604  | 4,333784614         | 4,69       | 3,64       | 4,67       | CG4257  | AAAAAGGCAATCTGAAAAGTTTCTCCTTCTAACCAT   |
| 10880  | 2,25169292          | 2,43       | 2,19       | 2,14       | CG6143  | AAATCGCCGTTGCAACACCTTTTAAATAAATTTCC    |
| 13610  | 2,289498998         | 3,02       | 1,17       | 2,68       | CG4241  | GTGCTAACAAAAACAAGGTCCCCACGTCGAGTCT     |
| 7245   | -2,088919833        | -2,61      | -1,84      | -1,82      | CG12038 | GCGGTGAAGGTAGGTGCGCTGGCCCGGCACAACGAT   |
| 7615   | -2,850123709        | -2,80      | -2,38      | -3,38      | CG32306 | ATTATTTTCTGTTTTCGGAAACCATTGCGGCCTCAA   |
| 89     | 2,037958018         | 2,24       | 2,55       | 1,32       | CG1674  | TCAAGGCGCAATACAAATGCCGTTGCTTCTCGCCA    |
| 16158  | -3,329879859        | -1,52      | -4,30      | -4,17      | CG1553  | AAACTATAAAATAGCCAGAACCTTCCAGAAATAGAA   |

|       |              |       |       |       |         |                                       |
|-------|--------------|-------|-------|-------|---------|---------------------------------------|
| 5742  | -3,302626977 | -3,51 | -2,48 | -3,92 | CG1630  | TCGCCGCCGCGTCTATATAAATACATAGATAGTTGC  |
| 14884 | 3,19192769   | 3,83  | 2,41  | 3,34  | CG14253 | CCACTGGAAAACACATATCAAGACCCATAAAAATCG  |
| 7909  | -2,950153858 | -2,90 | -3,08 | -2,87 | CG10579 | CAAATTGCAGATATGGAGACTGGCGCAGCACGGACA  |
| 6222  | 3,418715777  | 3,46  | 2,36  | 4,44  | CG3525  | TAGCACCTAATAGCCGTTCTTTTCGTGATATAGTCG  |
| 18441 | -2,617579328 | -2,89 | -2,64 | -2,32 | CG33130 | CGCTAATGAATCTGTGCGGTCCTAAACTCTATAAAC  |
| 16939 | -2,450967934 | -2,32 | -3,32 | -1,70 | CG30015 | CACAAGTAATCCGAAAGACCACCAACAAAAGAGAT   |
| 18445 | -2,055826313 | -2,50 | -1,61 | -2,06 | CG33130 | ACTCCCTCACTGTAAAAGAGTACCCCGATGATTATC  |
| 9879  | 3,272322824  | 3,65  | 3,43  | 2,74  | CG32156 | CTCACCGCCCTGCACCAGGCGTGCATAGACGACAAT  |
| 10203 | 9,575485759  | 9,78  | 8,44  | 10,51 | CG9739  | AACGGAATGGAAAAATGTTAGACCACGCCGTTTGT   |
| 5826  | -4,52218419  | -3,76 | -4,25 | -5,56 | CG32626 | GCCCGATGATTGCAAATGGCAGGCTACAGGACCTAG  |
| 7633  | -3,467488248 | -2,63 | -4,88 | -2,89 | CG1146  | GACACCACTTGAAGAAAGAGTGATGTGATGCATAA   |
| 3659  | 4,261114611  | 4,83  | 4,78  | 3,17  | CG9339  | GCTTCCAGTTCAGTCCAGGCAAGGAACCGGCACTGC  |
| 14674 | -5,921695427 | -4,88 | -6,29 | -6,60 | CG17383 | TAAATTGTATTTCTCGAGGAATGGAGAACCTGTGCG  |
| 11642 | 9,912087559  | 9,88  | 9,56  | 10,30 | CG2747  | TATCTCCGAGGCGCGCAGATCGTTTATAAACAGCGA  |
| 6390  | -2,260509237 | -2,85 | -2,02 | -1,91 | CG4829  | CAGTTATATATAGCTGCGCTCCATCACAATCCCAGC  |
| 2183  | 2,039306272  | 1,53  | 2,85  | 1,73  | CG33298 | AGCCTCATCAATCTATAGAATCACCGATTATGGGTC  |
| 9876  | 2,567774584  | 2,45  | 2,75  | 2,50  | CG32156 | GGGAATTTTCGCGGGAAAGCAAGCAGGAAAAGAAGAA |
| 14034 | -2,480123233 | -2,86 | -2,02 | -2,56 | CG7023  | ATCAAGGCGGAAGCACAGAAACGGAACGGGAACCA   |
| 13967 | 3,939545993  | 2,62  | 3,34  | 5,85  | CG7059  | AATGCGCGAAATTCAGGCCTCCCAATTTATGACGAA  |
| 13601 | 2,692863007  | 2,83  | 1,62  | 3,63  | CG4257  | GATCGAAGACAGGATAATGTCCGAACAAATAACGCC  |
| 17863 | 2,119487357  | 1,96  | 3,06  | 1,34  | CG16801 | GACTCCTGCCGCCGCCCTCACTGGGCAGTTTGCCGA  |
| 2926  | -2,584894262 | -2,40 | -2,42 | -2,93 | CG4551  | AATTGGTCTGTCATAAAGAAATCTTTATGTTTTGCG  |
| 5741  | -3,51219625  | -3,94 | -2,31 | -4,29 | CG1630  | TGGCTCGGGGTCTCGTCTAAATACATAGATAGTTGC  |
| 14486 | -3,079061231 | -3,48 | -3,37 | -2,38 | CG10693 | GCAAATTCGATGACTTAGGTGATATCACTCGTGACA  |
| 926   | -4,634453095 | -5,66 | -4,31 | -3,93 | CG16987 | AATGGATTATTAATTTGGACGAAACTTAACGAAAAG  |
| 6618  | -3,081038054 | -3,04 | -4,19 | -2,01 | CG6103  | GAAGTGGCTACCAAGGATGTGCAGTCCGTGATACAG  |
| 9016  | -2,485283064 | -2,03 | -3,17 | -2,26 | CG8177  | GACGAAACACAGAAAGTGCGCCGCGTAAACTAAAAC  |
| 11090 | -2,696353598 | -2,94 | -2,88 | -2,26 | CG31536 | GGAAGAGGAGTACACCAGTGGTCAATCCCCGGCGGA  |
| 7905  | -2,976313212 | -3,70 | -2,64 | -2,59 | CG10579 | TTTCCGAAAAAAGAGTATAATATTTGACCTCGTT    |
| 16496 | 2,434679007  | 2,17  | 2,91  | 2,22  | CG11804 | CTCCTTCAGCTTGTAACGCTCCCTTAAACGTTAAA   |
| 19154 | -3,301749962 | -3,64 | -3,77 | -2,49 | CG10433 | TGGAGTGCTGCTACGAACTCCGATCAAACCCAACAC  |
| 11133 | -2,052280448 | -2,42 | -2,16 | -1,58 | CG31543 | TATAATATAACCGCCGGTTGAGCGCCGCTATGAGGA  |
| 10204 | -6,322840872 | -6,93 | -7,12 | -4,91 | CG9739  | AAGCAGTGACAATCAATCCTGGGCGGAATCGAATGA  |
| 15145 | -2,812630138 | -3,05 | -2,86 | -2,52 | CG11956 | TAGGCAGCAAAAAGCGCGTTTTGGTAATGAAGTGGT  |
| 11134 | -2,363468783 | -2,93 | -2,66 | -1,50 | CG31543 | GGAACTTTTGGACAAGCGTGAGCGCCGCTATGAGGA  |
| 19222 | -2,94225084  | -3,42 | -3,04 | -2,37 | CG13503 | ACAAATCAGCGGGAAACGATGGCTATTCCGCCACCC  |
| 9877  | 2,570953852  | 2,17  | 2,70  | 2,84  | CG32156 | GGGAATTTTCGCGGGAAAGGAAAAGAAGAAGCAGCAG |
| 14670 | 8,6994043    | 7,78  | 11,41 | 6,92  | CG17383 | GGCGCAGCCTCCAAAAGATCTCGAATTCGCAATAT   |
| 11583 | -3,048115377 | -4,01 | -3,49 | -1,65 | CG32466 | ACGCGGTTACCGGACAAGGTGGCTGGGTCTGGGCG   |
| 16388 | 2,167164634  | 1,85  | 2,05  | 2,60  | CG8224  | CATCATCTTCAGCTACAGTTGCATGGTTGTCAAGTA  |
