# Supplementary material for: Global analysis of alternative splicing regulation by insulin and wingless signaling in Drosophila cells
Source: PubMed Central journal article supplement (PMC2687788; doi:10.1186/gb-2009-10-1-r11), 2009-01-29
Supplement: gb-2009-10-1-r11-S3.pdf [file gb-2009-10-1-r11-S3.pdf]

## A. Insulin

| GO term category                                      | Transcription (56) | AS (29)          | AS only (19) |
|-------------------------------------------------------|--------------------|------------------|--------------|
| Carbohydrate, amino acid and intermediate metabolism  | 6 (11%)            | 1 or 2 (4 or 7%) | 1 (5%)       |
| Immune response (including antifungal, antibacterial) | 12* (21%)          | 5 (17%)          | 1 (5%)       |
| Developmental decisions (including tracheal system)   | 28 (50%)           | 6 (21%)          | 4 (21%)      |
| Microtubule organization                              | 1 (2%)             | 2 (7%)           | 0            |
| Germline development; Oogenesis                       | 0                  | 7 (24%)          | 6 (32%)      |
| Behavior, olfaction, memory, learning                 | 1 (2%)             | 3 (10%)          | 2 (10%)      |
| RNA metabolism                                        | 1 (2%)             | 0                | 3 (15%)      |
| Signal transduction, lipid metabolism                 | 2 (4%)             | 2 (7%)           | 0            |
| Cell death                                            | 0                  | 0                | 0            |
| other                                                 | 5 (9%)             | 1 (4%)           | 2 (10%)      |

\* includes hemopoiesis

## B. Wingless

| GO term category                                     | Transcription (47) | AS (34) | AS only (34) |
|------------------------------------------------------|--------------------|---------|--------------|
| Signal transduction, lipid metabolism                | 11 (23%)           | 8 (24%) | 6 (18%)      |
| Learning, memory, behavior, olfaction                | 9 (19%)            | 8 (24%) | 8 (24%)      |
| Developmental decisions                              | 15 (32%)           | 7 (21%) | 6 (18%)      |
| Cell death                                           | 0                  | 1 (3%)  | 1 (3%)       |
| Carbohydrate, amino acid and intermediate metabolism | 0                  | 0       | 0            |
| Immune response                                      | 3 (6%)             | 2 (6%)  | 1 (3%)       |
| RNA metabolism                                       | 0                  | 0       | 0            |
| Microtubule organization                             | 2 (4%)             | 0       | 0            |
| Germline development; Oogenesis/ Spermatogenesis     | 3 (6%)             | 3 (9%)  | 4 (12%)      |
| other                                                | 5 (11%)            | 4 (12%) | 8 (24%)      |
